# Supplementary material for: Development and evaluation of correction models for a low-cost fine particulate matter monitor
Source: Copernicus journal article supplement (doi:10.5194/amt-15-3315-2022), 2022-06-03
Supplement: Supplementary file 1 [file amt-15-3315-2022-supplement.pdf]

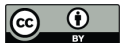

*Supplement of*

## **Development and evaluation of correction models for a low-cost fine particulate matter monitor**

**Brayden Nilson et al.**

*Correspondence to:* Brayden Nilson ([brayden.nilson@ec.gc.ca](mailto:brayden.nilson@ec.gc.ca))

The copyright of individual parts of the supplement might differ from the article licence.

## Results from Excluded Models

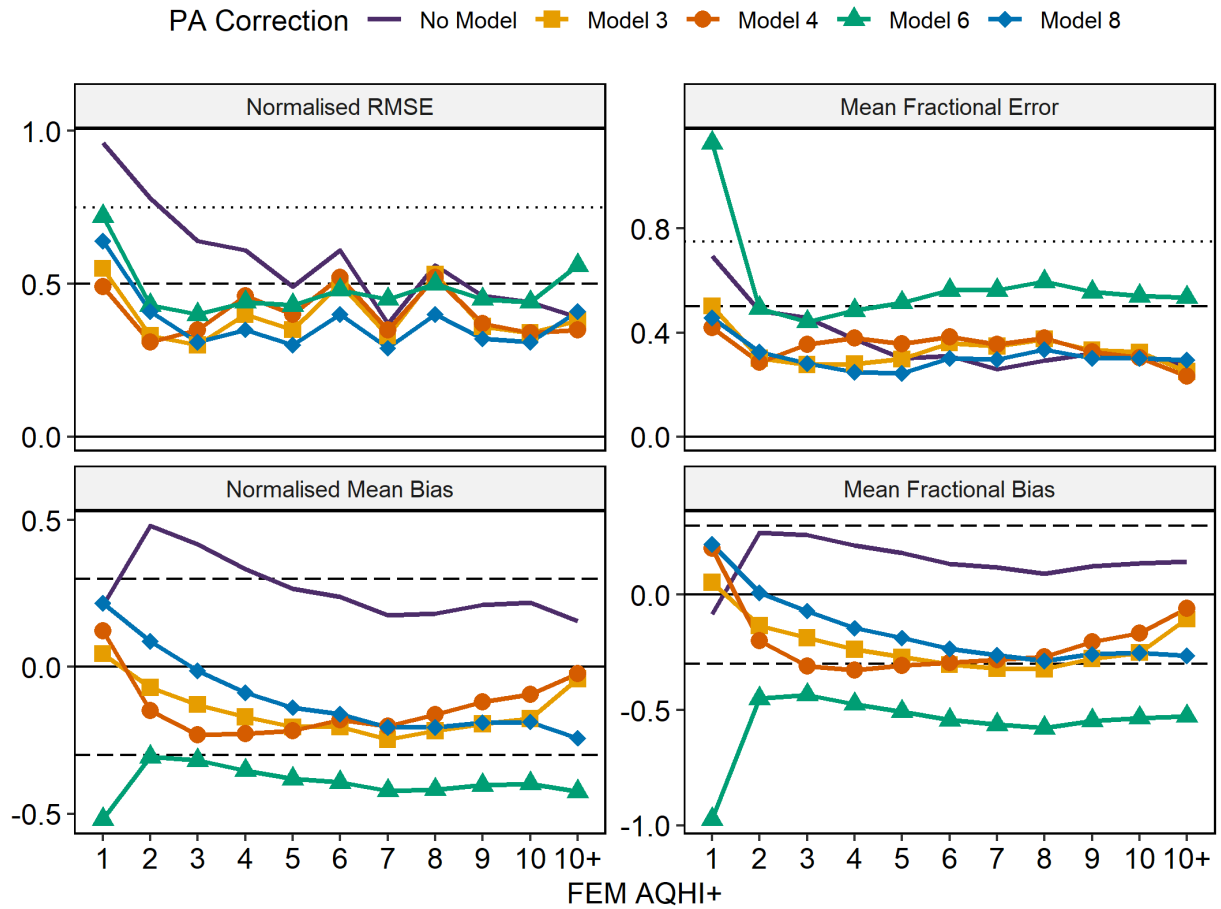

**Figure S1. Comparison statistics across Federal Equivalent Method (FEM) AQHI+ levels for the excluded correction models. Goal and acceptable levels are displayed where possible for RMSE (0.75 & 0.5), MFE (0.75 & 0.5), NMB ( $\pm 0.3$  &  $\pm 0.6$ ) and MFB ( $\pm 0.3$  &  $\pm 0.6$ ).**

**Table S1. PurpleAir (PA) normalised mean bias (NMB), normalised root mean square error (NRMSE), mean fractional error (MFE) and mean fractional bias (MFB) at low/moderate/high/very high Federal Equivalent Method (FEM) AQHI+ levels for each excluded PA correction model. A crude score is calculated by averaging each statistics integer rank (from 1 to 5) for the models within that AQHI+ group. The top performing models are highlighted.**

| FEM AQHI+       | Model    | NMB   | NRMSE | MFE  | MFB   | Score |
|-----------------|----------|-------|-------|------|-------|-------|
| Low [1-3]       | No Model | 0.33  | 0.96  | 0.65 | -0.01 | 3.5   |
|                 | Model 3  | -0.01 | 0.48  | 0.46 | 0.01  | 2.3   |
|                 | Model 4  | -0.01 | 0.46  | 0.39 | 0.12  | 1.5   |
|                 | Model 6  | -0.42 | 0.63  | 1.00 | -0.87 | 4.8   |
|                 | Model 8  | 0.15  | 0.55  | 0.43 | 0.17  | 3.0   |
| Moderate [4-6]  | No Model | 0.30  | 0.59  | 0.35 | 0.20  | 3.5   |
|                 | Model 3  | -0.19 | 0.42  | 0.30 | -0.25 | 2.3   |
|                 | Model 4  | -0.22 | 0.46  | 0.37 | -0.32 | 3.6   |
|                 | Model 6  | -0.37 | 0.46  | 0.50 | -0.49 | 4.6   |
|                 | Model 8  | -0.12 | 0.35  | 0.25 | -0.17 | 1.0   |
| High [7-9]      | No Model | 0.19  | 0.47  | 0.28 | 0.11  | 2.1   |
|                 | Model 3  | -0.22 | 0.41  | 0.35 | -0.31 | 3.4   |
|                 | Model 4  | -0.17 | 0.41  | 0.36 | -0.26 | 2.4   |
|                 | Model 6  | -0.42 | 0.47  | 0.57 | -0.56 | 4.9   |
|                 | Model 8  | -0.20 | 0.34  | 0.31 | -0.27 | 2.3   |
| Very High [10+] | No Model | 0.16  | 0.39  | 0.28 | 0.14  | 2.9   |
|                 | Model 3  | -0.05 | 0.39  | 0.26 | -0.12 | 2.1   |
|                 | Model 4  | -0.03 | 0.35  | 0.24 | -0.07 | 1.0   |
|                 | Model 6  | -0.42 | 0.56  | 0.54 | -0.53 | 5.0   |
|                 | Model 8  | -0.24 | 0.42  | 0.30 | -0.26 | 4.0   |

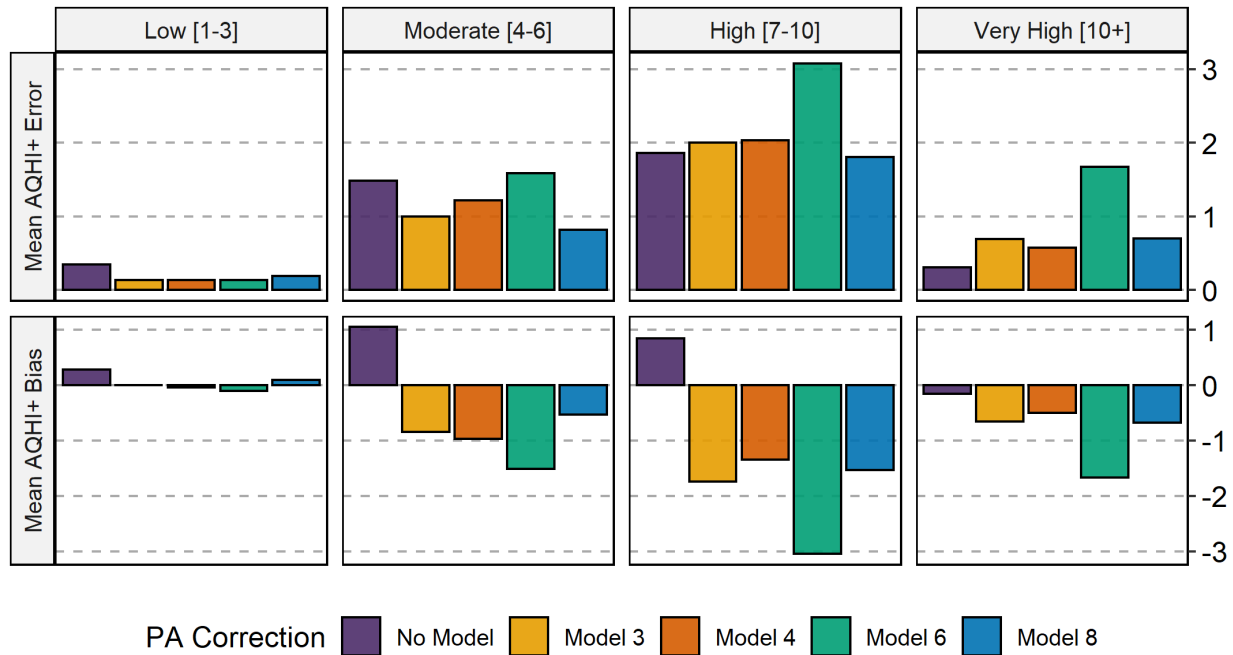

**Figure S2. Mean PurpleAir (PA) AQHI+ error and bias for low/moderate/high/very high Federal Equivalent Method (FEM) AQHI+ levels for excluded correction models.**

## Rationale for [30%,70%] RH Truncation

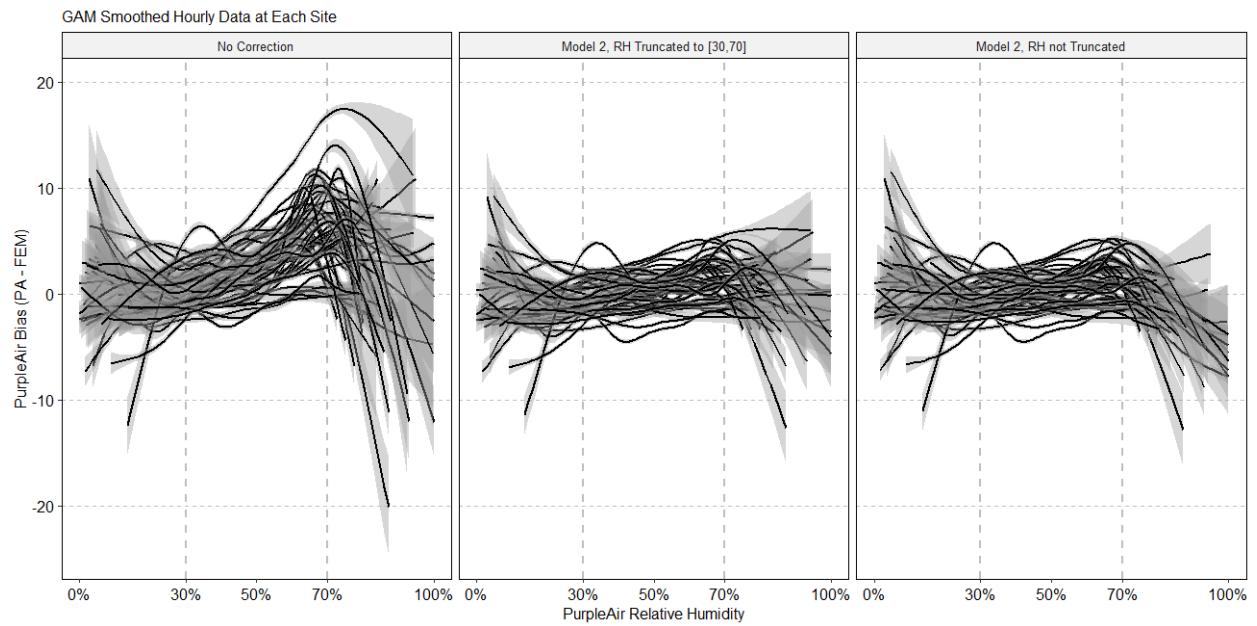

**Figure S3. General additive models for each colocation site showing hourly PurpleAir – FEM bias as a function of RH for uncorrected, corrected and truncated, and corrected but not truncated PurpleAir data. Note the increase in variability within the bias outside of [30%, 70%] RH.**

# Individual Testing Site Performance

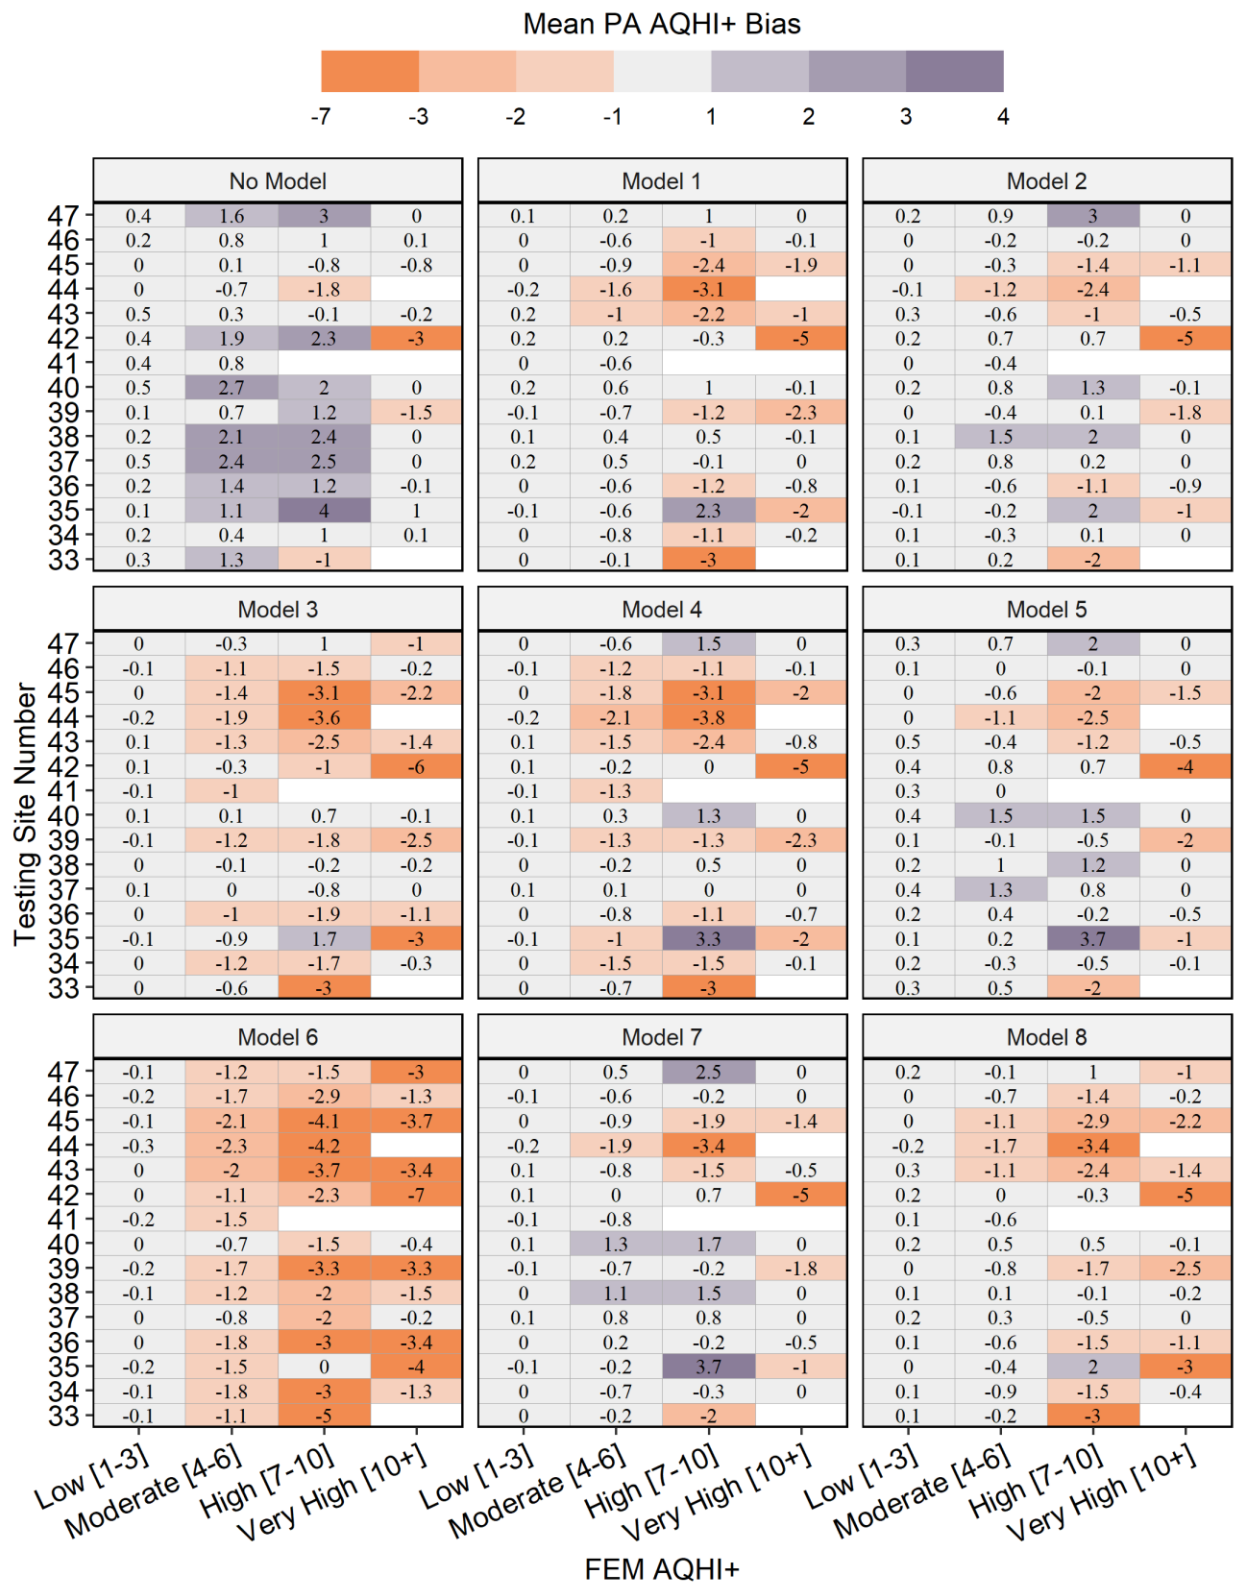

Figure S4. Mean PurpleAir AQHI+ bias for each correction model (including the raw data) at Federal Equivalent Method (FEM) AQHI+ levels at individual testing sites (See Table 1). A value at or near 0 is preferred, especially for higher AQHI+.
